# Supplementary material for: Flexible “polymer-in-ceramic” composite solid electrolyte PI–PEO0.2–PDA@LATP0.8 and its ionic conductivity
Source: Royal Society of Chemistry journal article supplement (doi:10.1039/d2ya00224h), 2022-01-01
Supplement: d2ya00224h1.pdf [file d2ya00224h1.pdf]

# Supporting Information

## Flexible “Polymer-in-Ceramic” Composite Solid Electrolyte PI-PEO<sub>0.2</sub>- PDA@LATP<sub>0.8</sub> and Its Ionic Conductivity

Lei He<sup>a</sup>, Jian-Hua Cao<sup>a</sup>, Ya-Kun Wang<sup>b</sup> and Da-Yong Wu<sup>\*a</sup>

<sup>a</sup> Technical Institute of Physics and Chemistry, Chinese Academy of Sciences, 29 Zhong-guan-cun East Road, Haidian District, Beijing 100190, PR China

<sup>b</sup> School of Foreign Studies, China University of Political Science and Law, 27 Fuxue Road, Changping District, Beijing 102249, PR China

---

\* Corresponding Author: [dayongwu@mail.ipc.ac.cn](mailto:dayongwu@mail.ipc.ac.cn)

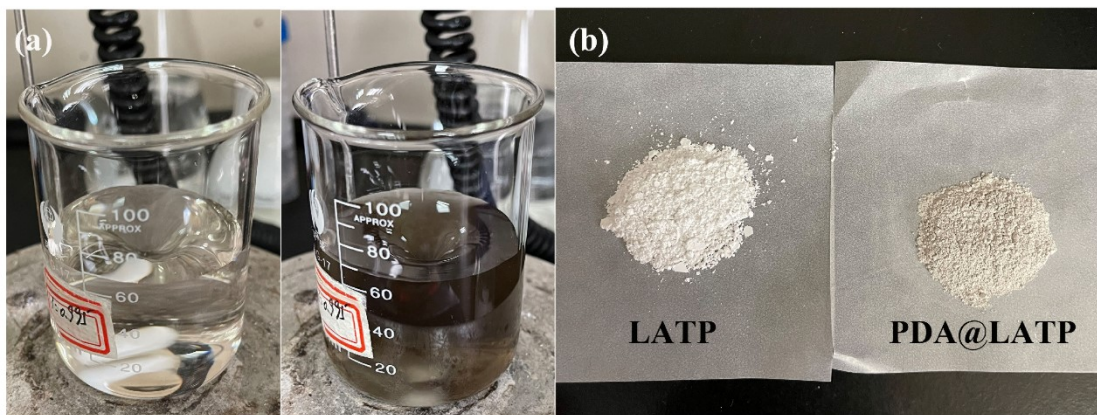

**Figure S1.** (a) Change in color of PDA solution (b) Comparison of PDA@LTP and LTP particles

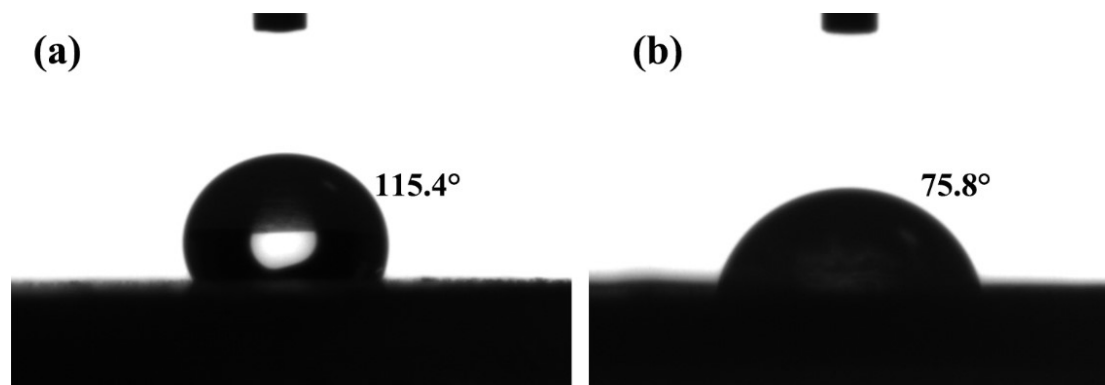

**Figure S2.** Contact angle of PEO/acetonitrile solution on (a) LAMP and (b) PDA@LAMP sheet

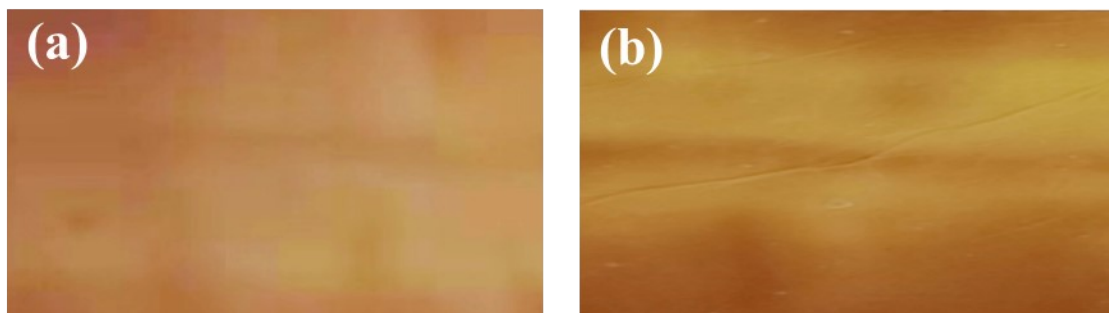

**Figure S3.** Photographs of PI-PEO<sub>0.2</sub>-PDA@LATP<sub>0.8</sub> electrolyte membrane before (a) and after bending (b)
